# Supplementary material for: Large-eddy simulation of a two-layer boundary-layer cloud system from the Arctic Ocean 2018 expedition
Source: Copernicus journal article supplement (doi:10.5194/acp-2022-809), 2022-12-20
Supplement: Supplementary file [file acp-2022-809-AC1-supplement.pdf]

## Reply to referee's #1 comments on manuscript:

This paper uses Large Eddy Simulation (LES) modelling to investigate the effects of aerosol and ice concentrations on a 2-layer Arctic stratocumulus cloud case study. The control case produces a cloud that seems to match the observations very well (although a more detailed comparison to observations could be performed; see below). The effects of changing the aerosol concentration is investigated with the model and shows an increase in LWP with increasing aerosols. At low aerosol concentration the upper cloud layer dissipates with large shortwave and longwave surface radiative impacts (a change from an overall net SW+LW warming of the surface in the control case to a near-zero net radiative surface flux; this will likely affect surface melting). The effects of ice concentrations and divergence are also investigated but they only have small impacts. Increasing the wind speed causes the lower cloud layer to dissipate while the upper one remains (but gets thinner). The removal of the lower layer causes an increase in the longwave surface cooling and reduces the net surface LW+SW flux by around 50%.

Overall, the study is well designed and the paper is well written with some interesting results. The model seems to produce realistic results for the control case, although the available observations could be used to test the model more thoroughly (e.g., a comparison of radar reflectivity). And there are some questions about how realistic the treatment of entrainment is (particularly its variation with aerosol concentrations). I also think that the paper could do a better job of describing some of the shortwave vs longwave effects of the upper cloud layer vs that of the lower cloud layer. Please see the comments below for more details on all of these issues.

I recommend the publication of this paper once the points below are addressed.

We thank the reviewer for carefully reading the manuscript and for the constructive comments.

### Main issues

Section 2.2 – the model details give no information about whether the model includes droplet sedimentation. It would be good to provide this information and to comment on what that implies for entrainment changes as a function of aerosol changes. More discussion on the literature of entrainment effects would also be good.

We agree with the reviewer that sedimentation can influence entrainment rates and their dependency on aerosol changes. However, we would argue that those changes should be more pronounced in the cases where the free troposphere (FT) is drier than the boundary layer (BL) than in the cases where the FT represents a moisture source for the BL, as is the case here. Nevertheless, in the Sect. 2.2., we have now added: "Sedimentation is not included in the model. Its introduction could lead to additional changes in simulated cloud properties (cf. Ackerman et al., 2004; Hoffmann and Feingold, 2019)."

Fig. 2 – is it possible to make versions of this from the modelled data for comparison to the observations? E.g., a comparison of the radar reflectivity would help to test whether the model precipitation rates and snow/graupel amounts are accurate since this is likely to be an important process that determines the sensitivity to aerosols. Or if not, it could be mentioned as something that could be done in the future.

We agree that this type of model output would be useful. However, it is not available in the current MIMICA version. It would require substantial work to either get the right output to run an offline radar simulator or implement a radar reflectivity parameterization in the model. Moreover, Figure 2 is included more to describe the particulars of the simulated situation than to provide a detailed evaluation. We believe that performing a detailed evaluation of the LES is beyond the scope of this paper. We have added a note on this issue in the manuscript: "To further analyze precipitation rates and specifically the amount of solid precipitation, comparing observed and modelled radar reflectivity would be a useful approach. However, calculation of radar reflectivity based on the model output is beyond the scope of this paper."

L432 – could the smaller IWP in the run with the larger LWP be due to the fact that there was lots of graupel in that run (Fig. 8i) so that graupel water path would actually be quite large (maybe around 5 g/m<sup>2</sup>). So if you

combined the ice, snow and graupel to give a total ice water path it may be larger than the other runs? Does the IWP from the observations also include snow and graupel?

The simulated IWP shown in Fig. 10b is the total IWP. Since the collection of cloud droplets by ice becomes less efficient in experiments with more LWP (i.e. when the cloud droplets are smaller in size), this process should be the main reason for the IWP decrease simulated in the experiments with a higher aerosol number concentration. We have now added to the Fig. 7 caption that both LWP and IWP are total values.

L444 – It would be worth mentioning the SW+LW effect – i.e. that very low aerosol can prevent the net surface energy input to the surface (that could cause melting).

We agree with the reviewer on this point. We now mention the net SW+LW effect with different sensitivity tests in all sections.

L576 – “This means that the lower layer became partially transparent to radiation so that the longwave radiative effect dominated instead of the shortwave effect, i.e., a lower aerosol concentration resulted in a cooling of the surface.” – this is a little bit imprecise and unclear. How about :- “This meant that the both cloud layers were partially transparent to shortwave radiation, which increased the shortwave heating of the surface. However, both cloud layers also became too thin to emit significant longwave radiation which increased the longwave cooling of the surface. The longwave radiative cooling effect dominated over the shortwave warming effect so that the lower aerosol concentration resulted in a cooling of the surface.”

We agree with the reviewer that our previous statement was not clear enough. We have now changed it to: “Without the upper cloud, and with a partially transparent lower cloud, the shortwave radiative flux at the surface increased. However, the optically thin lower cloud layer also emitted less longwave radiation, which led to increased longwave cooling of the surface. These two radiative fluxes were approximately balanced so the net radiative effect in this sensitivity test was around zero, in contrast to all other aerosol sensitivity simulations where the net radiative effect of the cloud structure was positive.”

- Although it's not clear from the rest of the paper whether you determined whether it was the disappearance of the top cloud layer in `aero_id_low` that led to the increase in net surface shortwave, or whether it was the thinning of the lower layer. And similarly for the longwave effects – the lower cloud layer still looks to be there in `aero_id_low`. Fig. 14 suggests that the removal of just the lower cloud layer in the `wind_8.5` experiment leads to an increase in the LW surface cooling from -4 to -12 W/m<sup>2</sup> by the end of the simulation (a difference of -8 W/m<sup>2</sup>), whereas Fig. 10 shows a reduction from -4 to -40 W/m<sup>2</sup> due to the removal of the upper cloud layer (with the lower cloud layer still present, although thinned out somewhat – Fig. 9). This suggests that it is the removal of the upper cloud layer in `aero_id_low` that is having the bigger impact on the longwave and shortwave fluxes?

- This should also be addressed in the abstract. Currently you write :-

- o “The investigated cloud structure is persistent unless there are low aerosol number concentrations ( $\leq 5 \text{ cm}^{-3}$ ), which cause the upper cloud layer to dissipate, or high large-scale wind speeds ( $\sim 8.5 \text{ m s}^{-1}$ ), which erode the lower inversion and the related cloud layer. These types of changes in cloud structure lead to a substantial reduction of the net longwave radiation at the surface due to a lower emissivity or higher altitude of the remaining cloud layer.”

- However, you should also mention the importance of the increased surface warming from the shortwave and increased LW cooling when the upper layer is eroded. It would also be good to talk about the net SW+LW effect in the abstract since this will help determine surface melting. I.e., the very low aerosol case leads to a near-zero net radiative heating at the surface, which may reduce or prevent surface melting. Although the wind effect on the surface net warming (lower layer only) is smaller.

We agree with this point as well. In the abstract, we have now written: “The changes in cloud structure alter both the short- and longwave cloud radiative effect at the surface. This results in changes in the net radiative effect of the modelled cloud system, which can impact the surface melting/freezing.” We have tried to mention everything relevant but to keep it general.

L584 – It would be good to document what happens to the total ice water path here as well (ice+snow+graupel). Also, it is interesting that IWP increases towards the end of the simulation in the lower ice concentration cases, so that it matches the higher ice concentration cases – can you say something on why this is?

Figure 12b shows the total IWP, which increases with time in all the ICNC experiments (also note the logarithmic scale; the absolute value increases approximately at the same rate in all three simulations). Moreover, in almost all simulations in this study, the IWP suddenly increases around 17h. This most probably corresponds to when the cloud becomes cold enough; so, the ice formation becomes efficient.

We agree that this was not explained in detail. Therefore, we have now written: “Moreover, in the control simulation, the IWP suddenly increases ~16-17h. This is most probably due to the fact that the cloud becomes cold enough to trigger efficient ice formation. Both LWP and IWP then continues to increase for ~4h, indicating a continuous cloud water production, until LWP finally starts to decrease around 21h. Note, however, that, first, the increasing LWP is much larger than the increase in IWP and, second, the decrease in LWP after 21h is larger than the increase in IWP by an order of magnitude. This is also in agreement with previous findings (cf. Dimitrelos et al., 2020).”

However, we have added this to the Sect. 4.2.1. since this sudden IWP increase with time can already be seen in the experiments with different aerosol number concentrations.

L593 – “A noticeable effect on the longwave radiation was only obtained in the experiments where the lower cloud layer became optically thin or completely dissipated (i.e., the simulations with the lowest aerosol number concentrations and the highest wind speed, respectively).”

- I’m not sure that I agree with this since the removal of the upper cloud seemed to have an even larger large longwave effect – see above.

This statement is strictly correct since the net longwave radiative flux at the surface does not change significantly in any experiment except in the two tests we have mentioned. As long as the lower cloud layer is optically thick, the upper cloud layer does not significantly impact the longwave flux at the surface since the lower cloud layer is closer to the surface and warmer. But as soon as the lower cloud layer becomes optically thin, the influence of the upper cloud layer is also important (which can be seen when comparing the `aero_id_low` and `wind_8.5` simulations). It is important to note here that the lower cloud layer doesn’t have to be very optically thick; the upper layer can still dominate the total LWP. It just has to be thick enough to be a black body; then, the surface longwave net radiation will be determined by the surface temperature and the temperature of the lower cloud layer.

In the Conclusions section, we have now added one more sentence to clarify this: “However, when the lower cloud layer was not optically thick, the upper cloud layer also affected the surface longwave radiation (the surface cooling was much stronger in the simulation with the lowest aerosol concentration than in the simulation with the highest wind spend due to the lack of an upper cloud layer in the first experiment).”

## Figures

Fig. 2 – It would be good to have some titles and colorbar labels on this figure.

The colourbar units have now been added.

Fig. 5 – It’s not quite clear what  $dN$  refers to and why the x-axis is the modal diameter. Is this instead showing  $dN/d\log D_p$  with  $D_p$  being just the aerosol diameter? I.e., does the integral under the curves give the total number?

The y-axis shows  $dN$  ( $dN/d\log D_p$  multiplied with  $d\log D_p$ ). The modal integrals under the fitted curve correspond to  $dN$  values, which are the numbers used as the model input parameters (also shown in Table A1). Using  $dN/d\log D_p$  would not correspond to the numbers we used in our simulations. We understand this was not explained well in the previous manuscript version. Thus, we have added: “Note that the  $dN$  values shown in Table A1 represent the modal integrals under the fitted curve in Fig. 5 (y-axis;  $dN/d\log D_p$  multiplied with  $d\log D_p$ ) and are the numbers used as the model input parameters.”

The x-axis label is now changed to aerosol diameter.

Fig. 6 – the colours for 12 and 18h are not very colorblind friendly – I’m finding it hard to distinguish them.

This is now updated. Also, the colours in Fig. A1 are changed accordingly.

#### **Typos etc.**

L23 – “capped by a lower temperature inversion” – do you mean a smaller magnitude inversion or a lower-altitude one?

We have now changed it to a “lower-altitude” inversion.

L24 – “The investigated cloud structure” – better as “The simulated cloud structure” to show that this was the result of modelling rather than from observations.

Ok, we have changed it.

L27 – “net longwave radiation at the surface” – would be good to say that this is the “net downwelling longwave radiation” for clarity.

This sentence is not the same as it was in the first version of the manuscript.

L85 – “difficulty to simulate” -> “difficulty simulating”.

Ok.

L150 – “minimize the risk of sampling pollution from the ship, I/B Oden was turned approximately upwind” – it would be good to mention that the ship exhausts are (presumably) at the rear of the ship relative to the instruments.

This has now been added.

L359 – “likely due to that large-scale advection is not explicitly considered in the LES” -> “likely due to the fact that large-scale advection is not explicitly considered in the LES”

This is added.

L419 – “less (more) aerosols” -> “fewer (more) aerosols”

This is changed.

L568 – “solar part of the spectrum” should be “shortwave part of the spectrum” since the solar spectrum covers the whole range (although peaking in SW of course).

We agree, this has been changed.

L570 – “for 4W/m<sup>2</sup>” -> “by 4 W/m<sup>2</sup>”.

It is changed.

L572 – “When Aitken and accumulation mode aerosol number concentrations in. being representative of the whole ice drift period” -> “When Aitken and accumulation mode aerosol number concentrations that were representative of the whole ice drift period”

We have changed this.

L573 – “then the total LWP decreased substantially (up to 150 g m<sup>-2</sup>)” -> “then the total LWP decreased substantially (by up to 150 g m<sup>-2</sup>)”

We have added “by”.

L575 – “representative of the lowest observed percentile (=5 cm<sup>-3</sup>),” -> “representative of the 25th percentile of the ice drift observations (=5 cm<sup>-3</sup>),”

This is also changed.
